# Supplementary material
Source: PubMed Central journal article supplement (PMC3065724)
Supplement: Supp_Data.pdf [file Supp_Data.pdf]

## SUPPLEMENTARY DATA

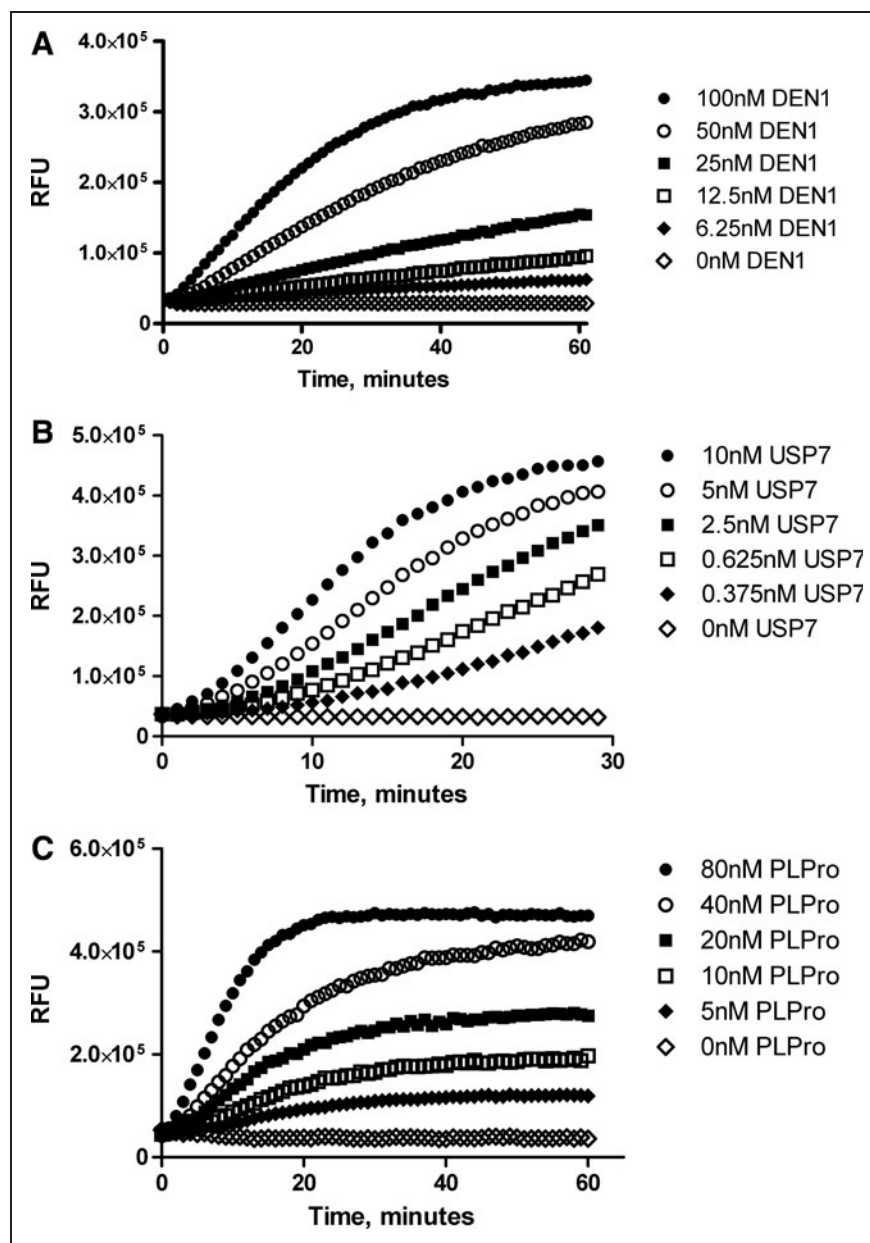

**Supplementary Fig. S1.** Detection of various ubiquitin/ubiquitin-like protease activities with ubiquitin-EK<sub>L</sub> system. **(A)** Increasing concentrations of DEN1 (0 nM ◇, 6.25 nM ◆, 12.5 nM □, 25 nM ■, 50 nM ○, 100 nM ●) were incubated with 100 nM NEDD8-EK<sub>L</sub>, 20 nM of EK<sub>L</sub> substrate I. Fluorescence was measured at ex485/em531. **(B)** Increasing concentrations of USP7 (0 nM ◇, 0.375 nM ◆, 0.625 nM □, 2.5 nM ■, 5 nM ○, 10 nM ●) were incubated with 10 nM Ubiquitin-EK<sub>L</sub> and 20 nM of EK<sub>L</sub> substrate I. **(C)** Increasing concentrations of PLPro (0 nM ◇, 5 nM ◆, 10 nM □, 20 nM ■, 40 nM ○, 80 nM ●) were incubated with 50 nM ISG15-EK<sub>L</sub> and 20 nM of EK<sub>L</sub> substrate I. EK<sub>L</sub>, enterokinase light chain; USP, ubiquitin-specific protease.

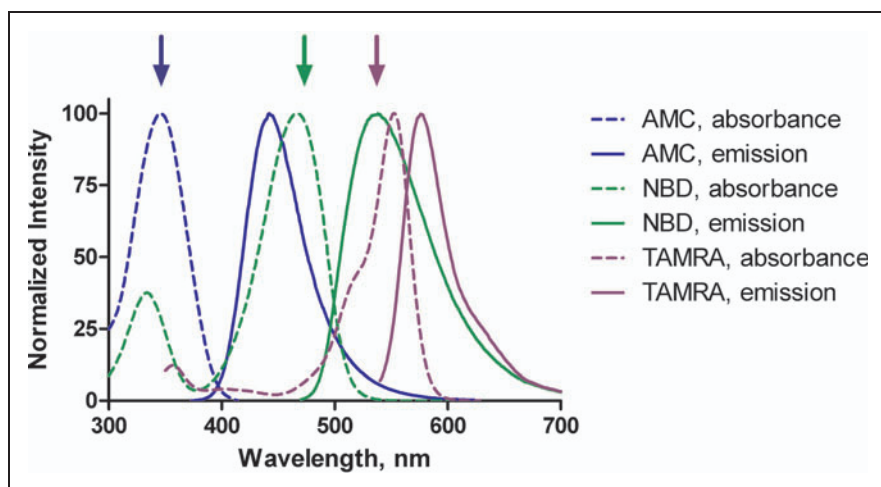

**Supplementary Fig. S2.** Absorbance and emission spectra of the fluorophores used in this study. Spectra of AMC, NBD, and TAMRA were obtained from Invitrogen. Dotted lines represent absorbance spectra and solid lines represent emission spectra. AMC is shown in blue, NBD in green, and TAMRA in purple. Arrows represent the excitation wavelengths used in this article (blue for AMC, green for NBD, and purple for TAMRA). AMC, 7-amino-4-methylcoumarin; TAMRA, carboxytetramethylrhodamine.
